# Supplementary material for: Implementing a Virtual Community of Practice for Family Physician Training: A Mixed-Methods Case Study
Source: J Med Internet Res. 2014 Mar 12;16(3):e83. doi: 10.2196/jmir.3083 (PMC3967123; doi:10.2196/jmir.3083)
Supplement: Supplementary file 2 [file jmir_v16i3e83_app2.pdf]

## Multimedia Appendix 2: Knowledge and Implementation Needs of GPT1s, ranked by GPT1s and supervisors.

| <b>GPT1 Rankings</b>                   | <b>Mean</b> | <b>SD</b> | <b>Rank</b> | <b>Supervisor rankings</b>                | <b>N</b> | <b>Mean</b> | <b>SD</b> | <b>Rank</b> |
|----------------------------------------|-------------|-----------|-------------|-------------------------------------------|----------|-------------|-----------|-------------|
| Knowledge: Work injury consultations   | 4.5         | 0.68      | <b>1</b>    | Knowledge: Administration                 | 22       | 4.5         | 0.91      | <b>1</b>    |
| Knowledge: Fitness to Drive            | 4.45        | 0.68      | <b>2</b>    | Implementation: Administration            | 22       | 4.5         | 0.6       | <b>2</b>    |
| Knowledge: Administration              | 4.43        | 0.71      | <b>3</b>    | Implementation: Mental Health             | 22       | 4.4         | 0.5       | <b>3</b>    |
| Implementation: Administration         | 4.43        | 0.71      | <b>4</b>    | Implementation: Work injury consultations | 22       | 4.41        | 0.5       | <b>4</b>    |
| Knowledge: Mental Health               | 4.35        | 0.86      | <b>5</b>    | Knowledge: Managing Consultations         | 22       | 4.31        | 0.89      | <b>5</b>    |
| Knowledge: Diabetes                    | 4.33        | 0.66      | <b>6</b>    | Knowledge: Mental Health                  | 22       | 4.31        | 0.89      | <b>6</b>    |
| Implementation: Mental Health          | 4.33        | 0.92      | <b>7</b>    | Implementation: Fitness to Drive          | 22       | 4.32        | 0.57      | <b>7</b>    |
| Implementation: Work injury consults   | 4.3         | 0.91      | <b>8</b>    | Knowledge: The Elderly patient            | 22       | 4.27        | 0.88      | <b>8</b>    |
| Knowledge: Cardiovascular care         | 4.25        | 0.81      | <b>9</b>    | Knowledge: Women's Health                 | 22       | 4.27        | 0.88      | <b>9</b>    |
| Knowledge: Paediatric care             | 4.25        | 0.74      | <b>10</b>   | Knowledge: Work injury consultations      | 22       | 4.27        | 0.93      | <b>10</b>   |
| Knowledge: The Elderly patient         | 4.25        | 0.67      | <b>11</b>   | Implementation: The Elderly patient       | 22       | 4.27        | 0.63      | <b>11</b>   |
| Implementation: Fitness to Drive       | 4.25        | 0.9       | <b>12</b>   | Knowledge: Fitness to Drive               | 22       | 4.23        | 0.92      | <b>12</b>   |
| Knowledge: Asthma                      | 4.23        | 0.8       | <b>13</b>   | Implementation: Managing Consultations    | 22       | 4.23        | 0.69      | <b>13</b>   |
| Knowledge: Women's Health              | 4.2         | 0.85      | <b>14</b>   | Implementation: Diabetes                  | 22       | 4.18        | 0.5       | <b>14</b>   |
| Knowledge: Lethargy                    | 4.2         | 0.76      | <b>15</b>   | Implementation: Women's Health            | 22       | 4.18        | 0.59      | <b>15</b>   |
| Knowledge: Men's Health                | 4.18        | 1.01      | <b>16</b>   | Implementation: Men's Health              | 22       | 4.18        | 0.66      | <b>16</b>   |
| Implementation: Asthma                 | 4.18        | 0.81      | <b>17</b>   | Knowledge: Men's Health                   | 22       | 4.14        | 0.83      | <b>17</b>   |
| Implementation: Diabetes               | 4.15        | 0.8       | <b>18</b>   | Implementation: Paediatric care           | 22       | 4.09        | 0.81      | <b>18</b>   |
| Implementation: Men's Health           | 4.1         | 0.98      | <b>19</b>   | Knowledge: Diabetes                       | 22       | 4.05        | 0.9       | <b>19</b>   |
| Implementation: Cardiovascular care    | 4.05        | 0.93      | <b>20</b>   | Implementation: Asthma                    | 22       | 4.05        | 0.72      | <b>20</b>   |
| Knowledge: Headaches                   | 4.03        | 0.89      | <b>21</b>   | Implementation: Headache                  | 22       | 4.05        | 0.58      | <b>21</b>   |
| Implementation: Lethargy               | 4.03        | 0.97      | <b>22</b>   | Knowledge: Paediatric care                | 22       | 4           | 0.87      | <b>22</b>   |
| Knowledge: Managing Consultations      | 4           | 0.93      | <b>23</b>   | Implementation: Lethargy                  | 22       | 4           | 0.62      | <b>23</b>   |
| Implementation: Paediatric care        | 4           | 0.99      | <b>24</b>   | Knowledge: Lethargy                       | 22       | 3.95        | 0.84      | <b>24</b>   |
| Implementation: Managing Consultations | 3.98        | 0.97      | <b>25</b>   | Knowledge: Headaches                      | 22       | 3.91        | 0.97      | <b>25</b>   |
| Implementation: Elderly patient        | 3.98        | 0.92      | <b>26</b>   | Knowledge: Asthma                         | 22       | 3.86        | 0.94      | <b>26</b>   |

|                                |      |      |           |                                     |    |      |      |           |
|--------------------------------|------|------|-----------|-------------------------------------|----|------|------|-----------|
| Implementation: Headache       | 3.98 | 1.02 | <b>27</b> | Implementation: Cardiovascular care | 22 | 3.86 | 0.71 | <b>27</b> |
| Implementation: Women’s Health | 3.95 | 1.02 | <b>28</b> | Knowledge: Cardiovascular care      | 22 | 3.73 | 1.03 | <b>28</b> |
